# Supplementary material for: Once-Daily Valacyclovir to Reduce the Risk of Transmission of Genital Herpes
Source: Atypon-hosted journal article supplement (doi:10.1056/nejmoa035144), 2003-12-31
Supplement: nejm_corey_11sa1.pdf [file nejm_corey_11sa1.pdf]

# Supplementary Appendix

This appendix has been provided by the authors to give readers additional information about their work.

Supplement to: Corey L, Wald A, Patel R, et al. Once-Daily Valacyclovir to Reduce the Risk of Transmission of Genital Herpes. *N Engl J Med* 2004;350:11-20.

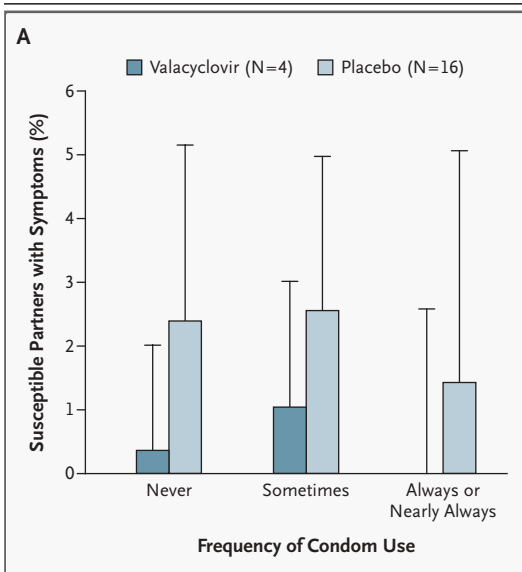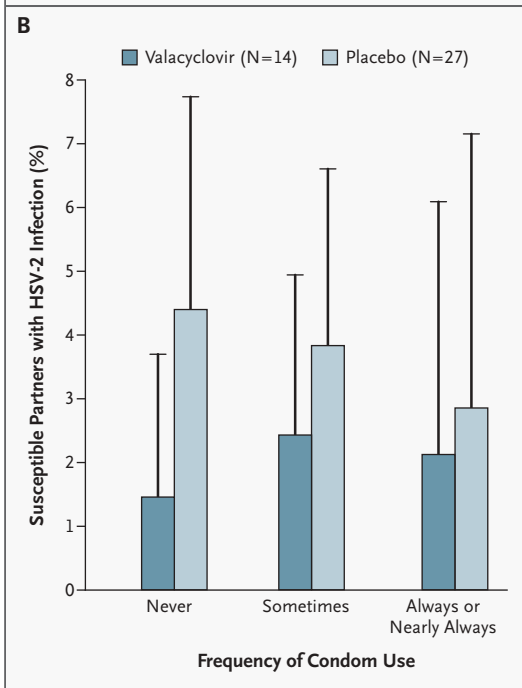

**Supplementary Appendix 1. Frequency of HSV-2 Acquisition According to Frequency of Condom Use.**

Couples reported their condom use at each monthly visit. Condom use was summarized for the duration of the study as never, sometimes (1 to 90 percent of sexual contacts), nearly always (>90 percent of sexual contacts), or always. Panel A shows the frequency of symptomatic HSV-2 infection in the susceptible partner at each level of condom use. Panel B shows the frequency of acquisition of HSV-2 infection in the susceptible partner at each level of condom use. In each panel, the T bars depict the upper end of the 95 percent confidence interval.
